# Supplementary material for: PARIN5, a Novel Thrombin Receptor Antagonist Modulates a Streptozotocin Mice Model for Diabetic Encephalopathy
Source: MDPI journal article supplement (doi:10.3390/ijms24032021), 2023-01-19
Supplement: s1 [file s1]

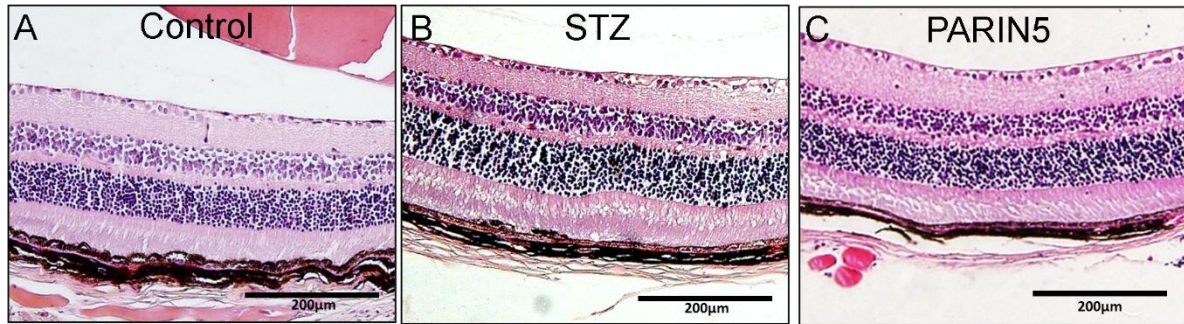

**Supplementary Figure S1.** Normal Retinal structure in STZ and STZ-PARIN5 treated mice: Representative hematoxylin-eosin retinal histology staining of 5 weeks STZ-induced diabetic mice retina compared to control and STZ-treated mice. Histological evaluation revealed no gross changes in the retinal layers, indicating normal retinal structures, and the absence of edema in (A) Control (N=2-3), (B) STZ (N=3-4), and (C) PAIRN5 STZ (N=3) treated mice. Scale bars 200µm. The lack of structural changes (as indicated by the H&E histology) in the relatively early diabetes stages (5 weeks following induction) suggests that the thrombin activity measures are preceding the clinical pathological observations conducted by the routine accepted means. This was further supported by Spectral domain optical coherence SD-OCT tests and multicolor fundus imaging indicated normal retinal vasculature and found no evidence of edema, neovascularization, microaneurysm, and hemorrhage in the retina.

**Supplementary Table S1. MIQE checklist.**

| Experimental design                                          |                                                                                                                      |           |                           |
|--------------------------------------------------------------|----------------------------------------------------------------------------------------------------------------------|-----------|---------------------------|
| Definition of experimental and control groups                | Comparison between the control group, healthy non-diabetic mice, STZ-induced diabetic mice, and PARIN5 treated mice. |           |                           |
| Number within each group                                     | Control non-diabetic mice: n=8<br>STZ induced diabetic mice: n=4<br>PARIN5 treated mice: n=3                         |           |                           |
| Sample                                                       |                                                                                                                      |           |                           |
| Description                                                  | Right half brain                                                                                                     |           |                           |
| Microdissection or macrodissection                           | Macrodissection                                                                                                      |           |                           |
| Processing procedure                                         | Fresh frozen tissue                                                                                                  |           |                           |
| If frozen, how and how quickly?                              | Snap-frozen in liquid nitrogen within 1 minute of surgery                                                            |           |                           |
| Sample storage condition and duration                        | Storage at -80°C until processing                                                                                    |           |                           |
| Nucleic acid extraction                                      |                                                                                                                      |           |                           |
| Procedure and instrument                                     | Homogenization using bullet blender homogenizer- BB*24B, Next Advance, NY, USA                                       |           |                           |
| Name of kit                                                  | ™ Total RNA Mini Kit, 7326820                                                                                        |           |                           |
| Details of DNase treatment                                   | Aurum DNase I, 7326828                                                                                               |           |                           |
| Nucleic acid quantification                                  | UV-Vis Spectrophotometer                                                                                             |           |                           |
| Instrument and method                                        | Thermo Scientific™ NanoDrop, 13-400-518                                                                              |           |                           |
| Purity ( <i>A</i> <sub>260</sub> / <i>A</i> <sub>280</sub> ) | Mean 2.141, Std. Deviation 0.029, St. Error 0.007                                                                    |           |                           |
| Reverse transcription                                        |                                                                                                                      |           |                           |
| Amount of RNA and reaction volume                            | 1µg in 20 µl reaction                                                                                                |           |                           |
| Reverse transcriptase and concentration                      | MultiScribe™ Reverse Transcriptase, 4311235, 50 units / 20 µl reaction                                               |           |                           |
| Temperature and time                                         | 10 minutes 25°C, 120 minutes 37°C, 5 minutes 85°C                                                                    |           |                           |
| qPCR target information                                      |                                                                                                                      |           |                           |
| Gene symbol                                                  | F2R (PAR1), F10 (FX), TNF a (TNF-α), F2 (PT)                                                                         |           |                           |
| Sequence accession number                                    | NM_010169 (PAR1), CT010325 (FX), 10479 (TNF-α), 88380 (PT)                                                           |           |                           |
| qPCR oligonucleotide                                         |                                                                                                                      |           |                           |
| Primer sequences                                             | Gene name                                                                                                            | Direction | Sequence                  |
|                                                              | PAR1                                                                                                                 | Forward   | GCCTCCATCATGCTCATGAC      |
|                                                              |                                                                                                                      | Reverse   | AAAGCAGACGATGAAGATGCA     |
|                                                              | FX                                                                                                                   | Forward   | GTGGCCGGGAATGCAA          |
|                                                              |                                                                                                                      | Reverse   | AACCCTTCATTGTCTTCGTTAATGA |
|                                                              | TNF-α                                                                                                                | Forward   | AGATCAATCGGCCCGACTATCTC   |
|                                                              |                                                                                                                      | Reverse   | GTTTGGAAGGTTGGATGTTTCGT   |
|                                                              | PT                                                                                                                   | Forward   | CCGAAAGGGCAACCTAGAGC      |
|                                                              |                                                                                                                      | Reverse   | GGCCCAGAACACGTCTGTG       |
| qPCR protocol                                                |                                                                                                                      |           |                           |
| Reaction volume and amount of cDNA                           | 50ng/10ml reaction mix                                                                                               |           |                           |
| Primer concentration                                         | 1000nM                                                                                                               |           |                           |
| Complete thermocycling parameters                            | 1 cycle of 95° C for 20 seconds<br>40 cycles of 95° C for 3 seconds<br>60° C for 30 seconds                          |           |                           |
| Manufacturer of qPCR instrument                              | StepOne™ Real-Time PCR System, Applied Biosystems                                                                    |           |                           |
| Data analysis                                                |                                                                                                                      |           |                           |
| qPCR analysis program                                        | StepOnePlus™ Software v2.3                                                                                           |           |                           |
| Normalization method                                         | Fixed thresholds and baseline for all samples per gene                                                               |           |                           |
| Statistical method for results significant                   | P<0.05                                                                                                               |           |                           |
